# Supplementary material for: Translational Research in Vitiligo
Source: Front Immunol. 2021 Mar 2;12:624517. doi: 10.3389/fimmu.2021.624517 (PMC7962476; doi:10.3389/fimmu.2021.624517)
Supplement: Supplementary Table 1 — Table describing key papers showcasing the inconsistencies within the neuronal hypothesis. Green indicates studies supporting the neuronal hypothesis, while red indicates studies not supporting the neuronal hypothesis. [file Table_1.xlsx]

## Sheet: Sheet1
		Article	Description	Subjects	Conclusion
	Dermatomes	Scholtz and Williamson (1951)	A case study on a single patient reported lesions to follow a dermatome.	n=1	Previous studies indicating dermatomal patterns are case studies and low powered. Van geel et al performed powered studies indicating lesions rarely are confined to a single dermatome.
		Zaima and Koga (2002)	Decribed distribution of localized vitiligo lesions over time. 3 of 44 patients maintained lesions only in a single dermatome.	n= 44
		Van geel et al (2010); Van geel et al (2013)	Lesions cross many dermatomes and rarely limited to a single dermatome. Lesions do not share significant overlap with diseases known to have neural cell involvment. Determination by three different investigators.	n=124 segmental patients; n=724 nonsegmental and 181 segmental patients
	Neural control of pigment	Kawauchi et al (2006)	Neural control of pigment is reported in fish and frogs.	n/a	These studies highlight the phenomena only in animals and no studies have been shown to occur in humans or other mammals.
	Neuropeptides and adenoreceptors	Wu et al (2000)	Increase of blood flow in vitiligo lesions was reported when compared to nonlesional skin, as well as increased adrenoreceptor response.	n=20	Some studies, inconsistently, have reported an increase of neuropeptides and catechoamines but these studies do not directly indicate neuron involment because melanocytes also produce catechoamines.
		Basnet et al (2018)	Increase of plasma and urinary catecholamines reported in generalized vitiligo patients.	n= 30 vitiligo patients n= 15 healthy controls
		Morrone et al (1992)	An increase of catecholamines was observed in vitiligo patient urine.	n= 150 vitiligo patients n=50 healthy controls
		Breathnach et al (1966)	Electron microscopy of neurons in vitiligo skin seem to have degenerative properties. Authors suggest it is the morphological data for the increased sweating and temperature reported in Chanco-Turner et al (1965).	n=5
		Al'Abadie et al (1994)	5 out 10 vitiligo patients had an increase neuropeptide Y on the boarder of lesions. Other neuropeptides in the study did not differ from healthy	n= 12 vitiligo patients n=7 healthy control
		Eisenhofer et al (2003)	Dopamine is produced by melanocytes in a tyrosinase-dependent process. Dopamine levels in the skin decrease as melanin production increased.	n/a; study is in mice
		Orecchia et al (1994)	Generalized and acrofacial vitiligo patients do not have significant differences in catechoamine levels compared to healthy control.	n= 40
	Sweating and vasconstriction	Chanco Turner et al (1965)	Increased temperature, sweat, and bleeding of vitiligo lesions	n=22	Many contradictory reports. Studies report inconsistent results as to whether this occurs in segmental or nonsegmental lesions, if at all.
		Sharquie et al (1985)	Increased sweating in vitiligo lesions compared to nonlesional skin. Data was obtained by a electrical resistance method. This is an indirect measuring technique for sweating.	n=31
		Elwary et al (1997)	Decreased sweating was reported of lesions and nonlesional skin in vitiligo patients compared to healthy control.	n=17-22
		Gopinathan (1965)	No changes in sweating was observed between vitiligo lesions and healthy skin.	n=13
	Spinal and peripheral nerve damage	Tremiterra (1927)	The onset of vitiligo occurred in a patient after spinal anesthesia. The depigmentation was localized similar to segmental vitiligo.	n=1	Inconsistent case reports. Some report vitiligo developing in areas of nerve damage, while others report vitiligo develops in areas spared from damage. There is no study that shows direct induction of vitiligo from nerve damage.
		Nellhaus (1970)	A case study of a single patient with viral encephalitis and poliosis who developed vitiligo within innervated areas. Cerebral atrophy occurred in left hemisphere (controls right side of body), right-sided spasticity and vitiligo developed on left side of face and neck (opposite side of brain/nerve damage).	n=1
		Lerner (1959)	One patient with transverse myelitis and paralysis developed vitiligo only above the spinal cord damage. Another patient who had poliomyleitis, developed vitligo less on the leg with nerve damage.	n=2
